# Supplementary material
Source: Springer Nature journal article supplement (https://www.springermedizin.de/resource/supplementary/13089_2014_113_MOESM1_ESM.pdf/9675688)

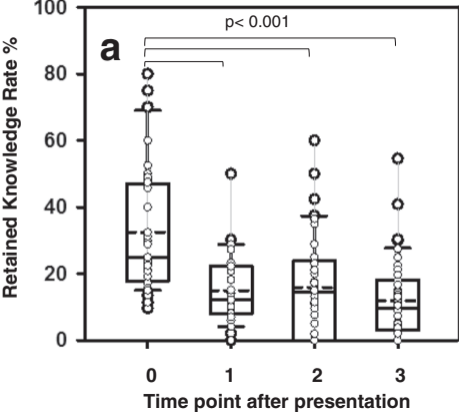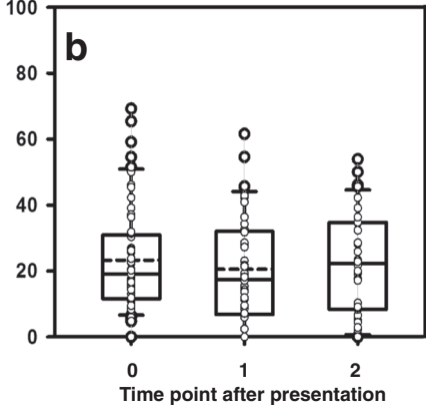

Supplement: MOESM1 [file 9675688]
